# Supplementary material for: A plausible mechanism for auxin patterning along the developing root
Source: PubMed Central journal article supplement (PMC2921385; doi:10.1186/1752-0509-4-98), 2010-07-21
Supplement: 1752-0509-4-98-S10.pdf [file 1752-0509-4-98-S10.pdf]

Additional file 10. Comparison of the model behavior with the basic and the robust sets of parameters.

| <i>Numerical experiments</i>                                                         | <i>The basic set of parameters</i>                                                                                                                                                                                                                                                                 | <i>The robust set of parameters</i>                                                                                                                                                                                                                                                                                                                                                              |
|--------------------------------------------------------------------------------------|----------------------------------------------------------------------------------------------------------------------------------------------------------------------------------------------------------------------------------------------------------------------------------------------------|--------------------------------------------------------------------------------------------------------------------------------------------------------------------------------------------------------------------------------------------------------------------------------------------------------------------------------------------------------------------------------------------------|
| <b>Estimation of the negative feedback from auxin to PIN1 expression</b>             | 10-fold decrease in PIN1 concentration observed when $a > 10 \text{ cu}$                                                                                                                                                                                                                           | 10-fold decrease in PIN1 concentration observed when $a > 4.1 \text{ cu}$                                                                                                                                                                                                                                                                                                                        |
| <b>Simulation of root growth in the full model</b>                                   | The minimal number of cells in the initial data =3<br>Position of the distal maximum in root growth is stable:<br>$a_5 = \max_{i=1...N}(a_i)$ when $N > 15$                                                                                                                                        | The minimal number of cells in the initial data =7<br>Position of the distal maximum in root growth is floating:<br>$a_k = \max_{i=1...N}(a_i)$ , when $10 \leq k \leq 25$ and $N > 40$                                                                                                                                                                                                          |
| <b>Conditions for appearance of oscillatory solutions in the minimal model</b>       | 1) increase in auxin flow from the shoot $\alpha > 1.2$ , or<br>2) decrease the rate of auxin active transport $K_0 < 0.13$ , or<br>3) changes in coefficients of auxin regulated PIN1 expression $q_1 > 1.3$ , $q_3 < 2.9$ , $q_2 < 5$ , or<br>4) decreased auxin dissipation rates $K_d < 0.003$ | 1) increased auxin diffusion rates $D > 0.12$                                                                                                                                                                                                                                                                                                                                                    |
| <b>Conditions for appearance of additional maximum in the inner part of the root</b> | The oscillatory solution found in the <i>minimal model</i> with increased value of auxin flow from the shoot ( $\alpha$ ) is transformed in the <i>full model</i> into periodical formation of additional auxin maxima.                                                                            | 1) increase in auxin flow from the shoot $1.1 < \alpha < 1.18$ , or<br>2) decrease the rate of auxin active transport $0.013 < K_0 < 0.23$ , or<br>3) changes in coefficients of auxin regulated PIN1 expression $1.2 < q_1 < 1.3$ , $2.7 < q_3 < 2.9$ , $4 < q_2 < 7$ , or<br>4) decreased auxin dissipation rates $0.0032 < K_d < 0.0037$ , or<br>5) as a reply to changes in the initial data |
| <b>Conditions for appearance of additional maximum at the root base</b>              | 1) increase in auxin flow from the shoot $\alpha > 1.6$ , or<br>2) decrease the rate of auxin active transport $K_0 < 0.05$ , or<br>3) changes in coefficients of auxin regulated PIN1 expression $q_1 > 1.9$ , $q_3 < 2.3$ , $q_2 < 3$                                                            | 1) increase in auxin flow from the shoot $\alpha > 1.18$ , or<br>2) decrease the rate of auxin active transport $K_0 < 0.13$ , or<br>3) changes in coefficients of auxin regulated PIN1 expression $q_1 > 1.2$ , $q_3 < 2.7$ , $q_2 < 4$ , or<br>4) decreased auxin dissipation rates $K_d < 0.0032$ , or<br>5) as a reply to changes in the initial data                                        |
| <b>The characteristics of the auxin transport system</b>                             | Distal auxin maximum is stable in root growth<br>Periodical formation of additional auxin maximum in the inner part of the root<br><br>Rare appearance of additional auxin maximum at the root base                                                                                                | Position of the distal auxin maximum is floating in root growth<br>Appearance of additional auxin maxima in the inner part of the root as a response to small changes in parameters or initial data<br>Frequent appearance of additional auxin maximum at the root base                                                                                                                          |
| <b>The root architecture under regulation of the auxin transport system</b>          | <b>Taproot-like</b>                                                                                                                                                                                                                                                                                | <b>Fibrous-like</b>                                                                                                                                                                                                                                                                                                                                                                              |
